# Supplementary material for: Synthesis and nanoparticle encapsulation of 3,5-difuranylvinyl-boradiaza-s-indacenes for near-infrared fluorescence imaging
Source: Royal Society of Chemistry journal article supplement (doi:10.1039/b813396d), 2009-01-01

*Electronic Supplementary Information*

## Synthesis and Nanoparticle Encapsulation of 3,5-Difuranylvinyl-boradiazas-indacenes for Near-Infrared Fluorescence Imaging

Sehoon Kim, Tymish Y. Ohulchansky, Alexander Baev, and Paras N. Prasad\*

*The Institute for Lasers, Photonics and Biophotonics, Department of Chemistry, State University of  
New York, Buffalo, New York 14260-3000*

<sup>1</sup>H NMR spectra (CDCl<sub>3</sub>): (left) whole range, (right) magnified aromatic range

### 1. 2-(2-{5-[Ethoxycarbonyl]-furan-2-yl}vinyl)-1H-pyrrole (2)

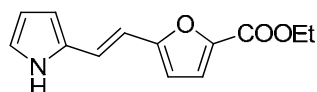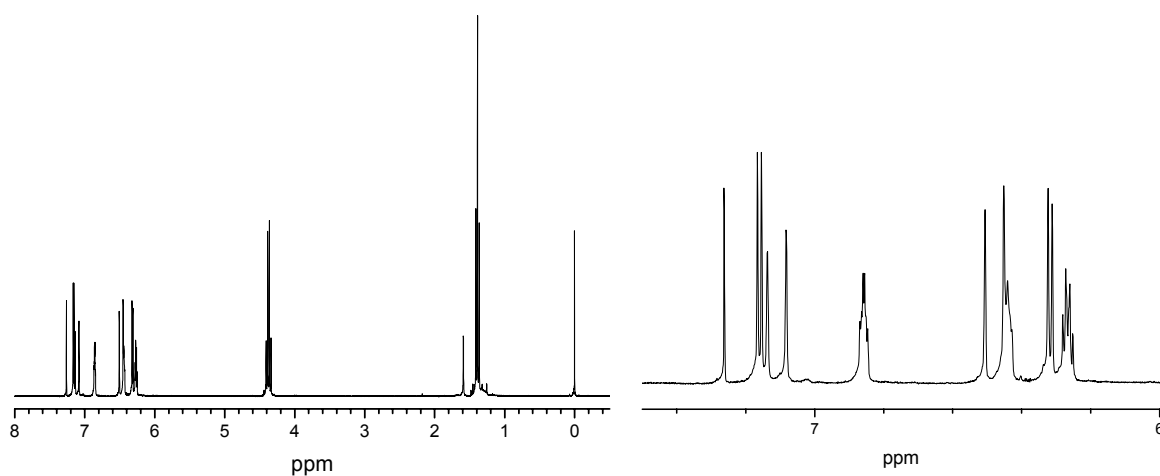

**2. 3,5-Bis(2-{5-[ethoxycarbonyl]-furan-2-yl}vinyl)-8-(furan-2-yl)-BODOPY (FB-O)**

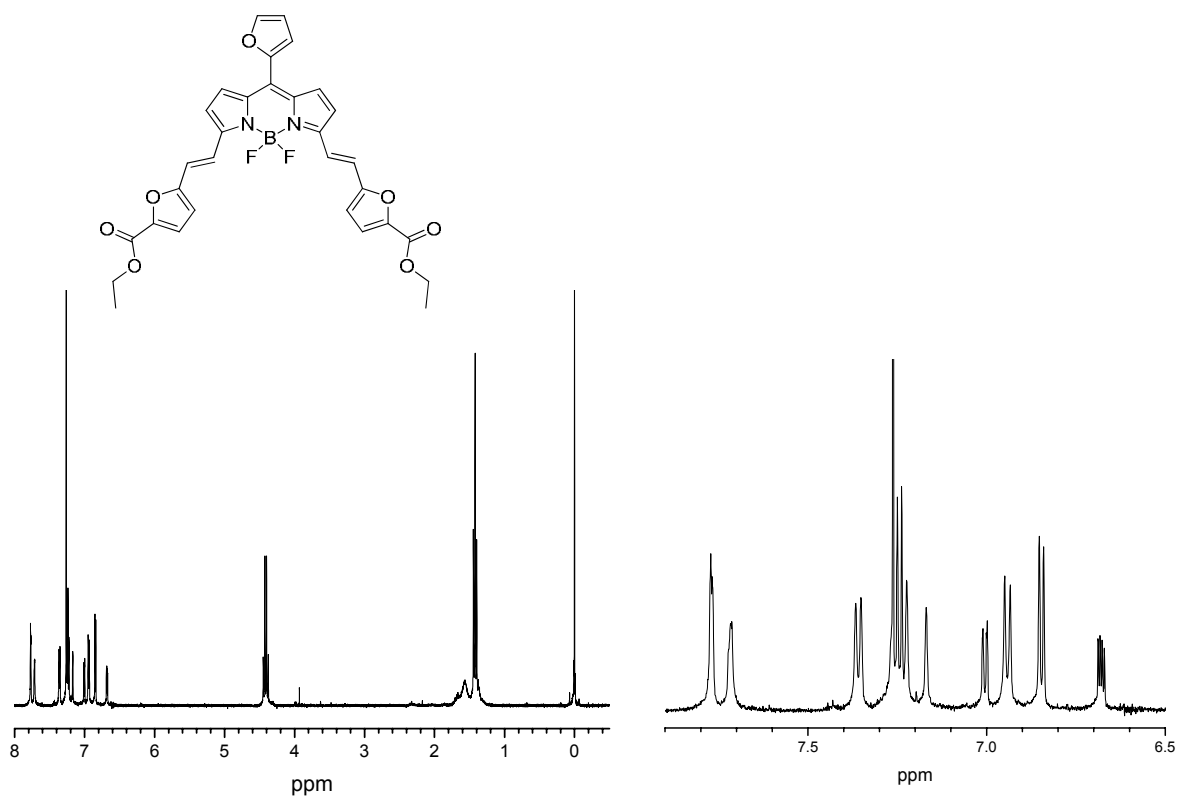

**3. 3,5-Bis(2-{5-[ethoxycarbonyl]-furan-2-yl}vinyl)-8-(thiophen-2-yl)-BODOPY (FB-S)**

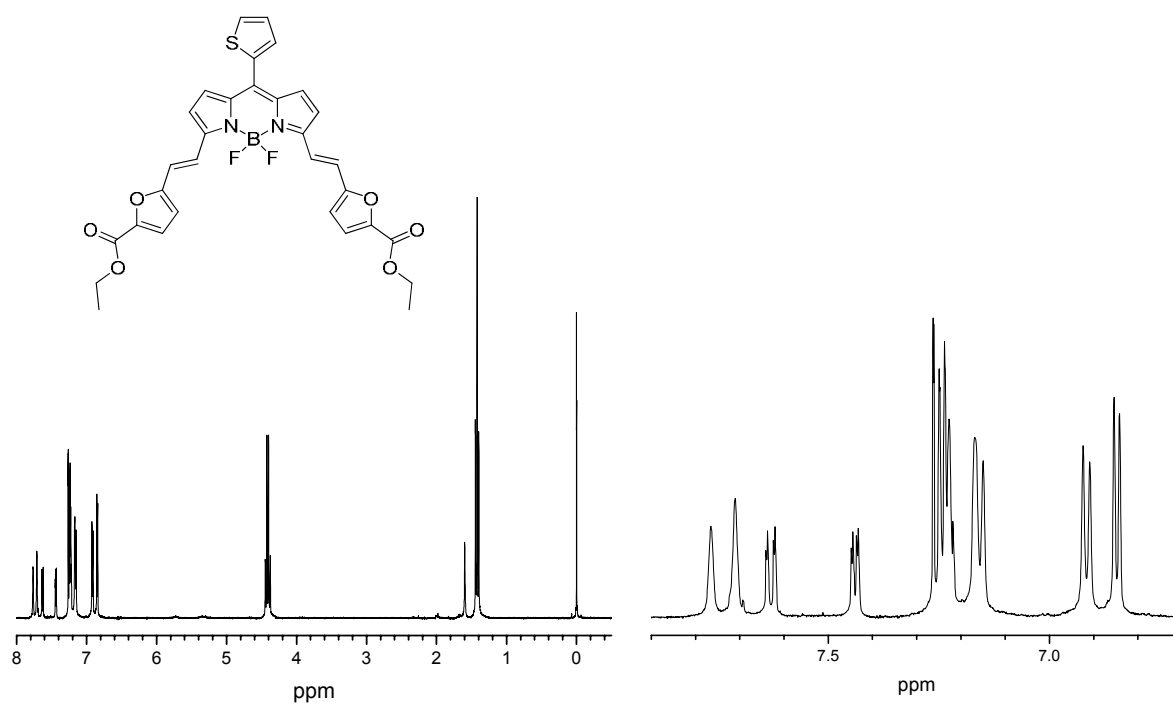

**4. 3,5-Bis(2-{5-[ethoxycarbonyl]-furan-2-yl}vinyl)-8-(selenophen-2-yl)-BODOPY (FB-Se)**

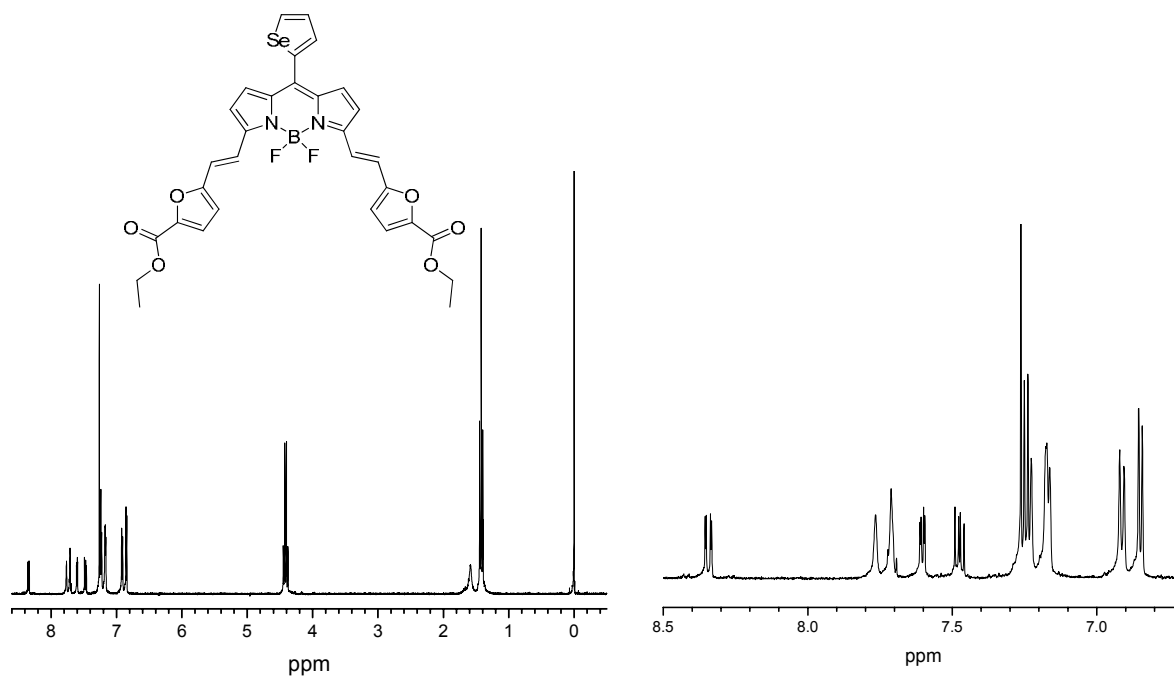

**5. 3,5-Bis(2-{5-[ethoxycarbonyl]-furan-2-yl}vinyl)-8-phenyl-BODOPY (FB-Ph)**

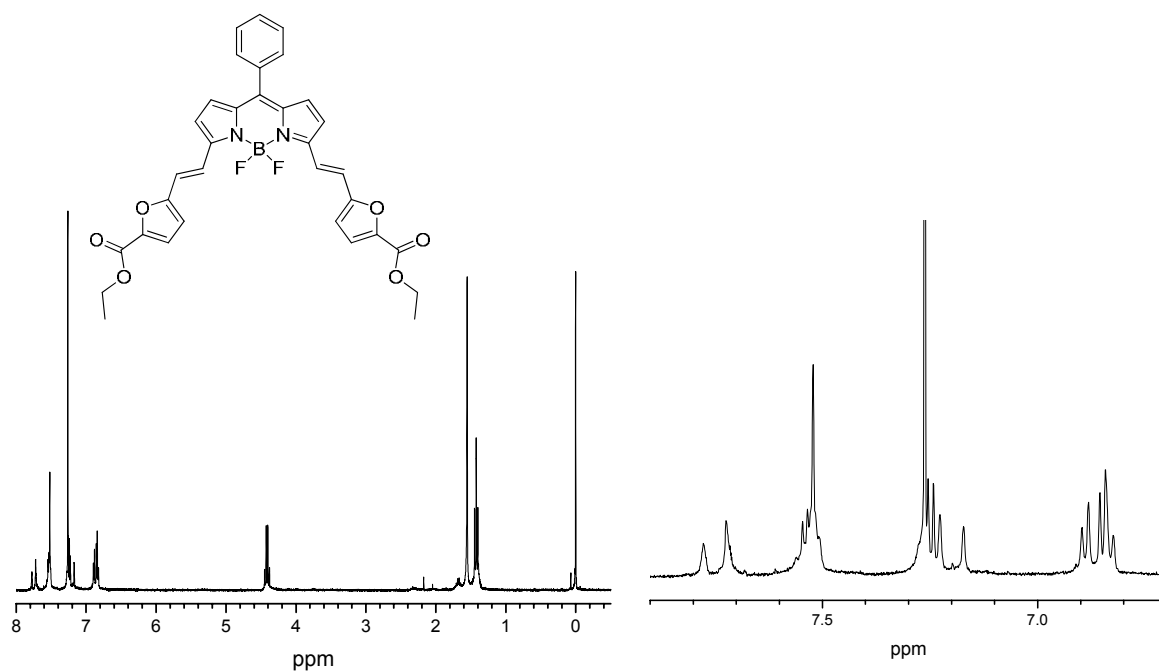

**6. 3,5-Bis(2-{5-[ethoxycarbonyl]-furan-2-yl}vinyl)-8-(5-iodofuran-2-yl)-BODOPY (FB-I1)**

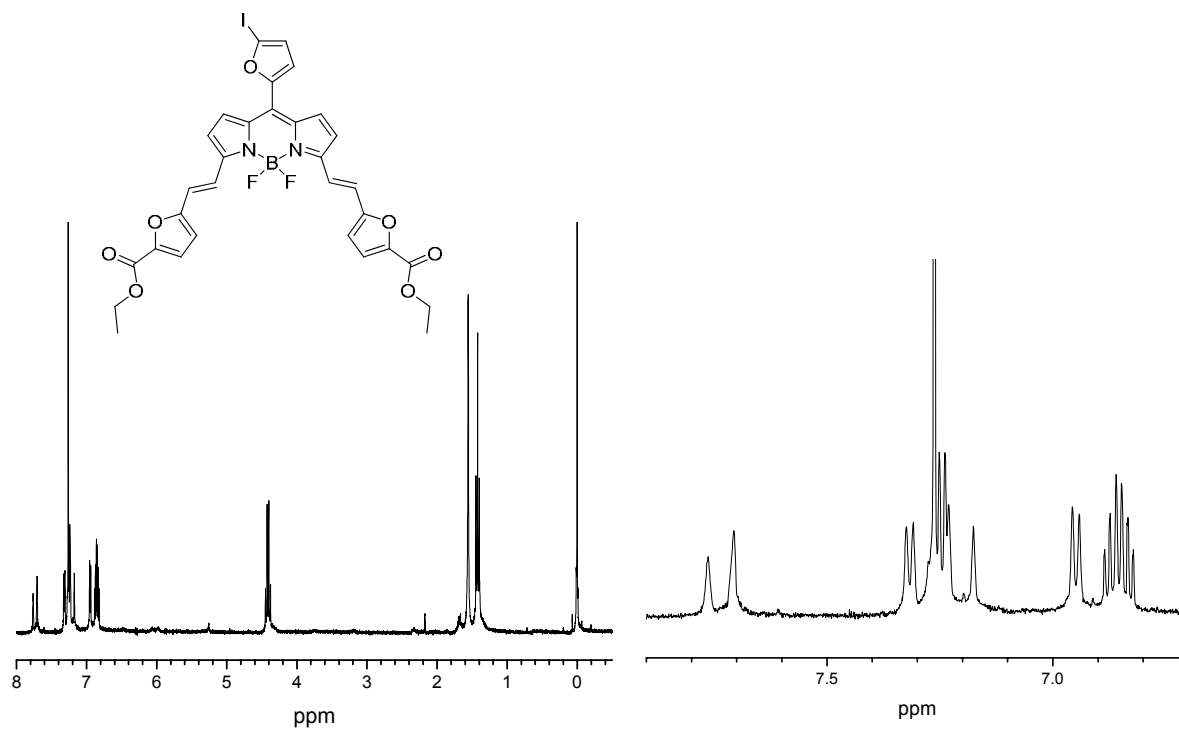

**7. 2-Iodo-3,5-bis(2-{5-[ethoxycarbonyl]-furan-2-yl}vinyl)-8-(5-iodofuran-2-yl)-BODOPY (FB-I2)**

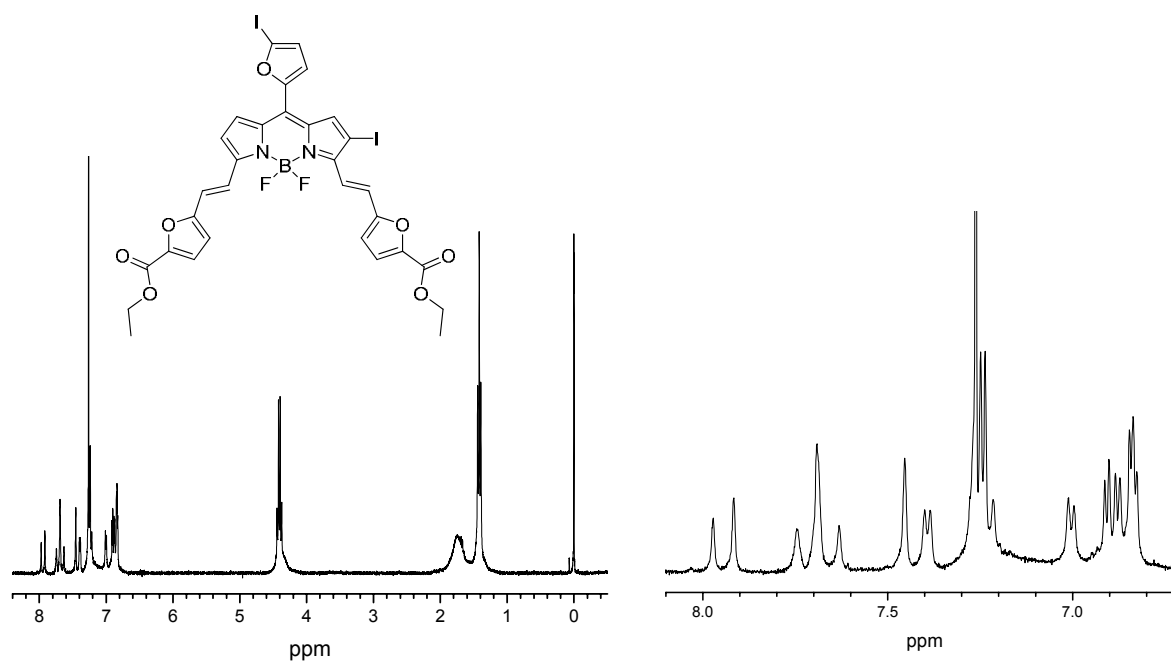

Supplement: b813396d.pdf [file b813396d.pdf]
